# Supplementary material for: Phylogenetic Analyses Suggest that Factors Other Than the Capsid Protein Play a Role in the Epidemic Potential of GII.2 Norovirus
Source: PubMed Central journal article supplement (PMC5437133; doi:10.1128/mspheredirect.00187-17), 2017-05-17
Supplement: sph003172286st7.pdf [file sph003172286st7.pdf]

Table S1: Dataset

| Strain                                   | Accession number | Isolation year | Location | RdRp genotype | Capsid genotype |
|------------------------------------------|------------------|----------------|----------|---------------|-----------------|
| Hu/GII.P16-GII.2/CUHK-NS-1082/2016/HK    | KY771081         | 2016           | HKG      | GII.P16       | GII.2           |
| Hu/GII.2/CUHK-NS-1231/2016/HKG           | KY421044         | 2016           | HKG      | NA            | GII.2           |
| Hu/GII.2/15-DS-4/2015/TPE                | KT962983         | 2015           | TPE      | NA            | GII.2           |
| Hu/GII.P16-GII.2/Akita8/2012/JPN         | LC145786         | 2012           | JPN      | GII.P16       | GII.2           |
| Hu/GII.P16-GII.2/Miyagi1/2012/JPN        | LC145787         | 2012           | JPN      | GII.P16       | GII.2           |
| Hu/GII.P16-GII.2/Niigata5/2012/JPN       | LC145788         | 2012           | JPN      | GII.P16       | GII.2           |
| Hu/GII.P16-GII.2/Fukui1/2012/JPN         | LC145789         | 2012           | JPN      | GII.P16       | GII.2           |
| Hu/GII.P16-GII.2/Fukui2/2012/JPN         | LC145790         | 2012           | JPN      | GII.P16       | GII.2           |
| Hu/GII.P16-GII.2/Saitama4/2012/JPN       | LC145791         | 2012           | JPN      | GII.P16       | GII.2           |
| Hu/GII.P16-GII.2/Saitama5/2012/JPN       | LC145792         | 2012           | JPN      | GII.P16       | GII.2           |
| Hu/GII.P16-GII.2/Osakacity5/2012/JPN     | LC145793         | 2012           | JPN      | GII.P16       | GII.2           |
| Hu/GII.P16-GII.2/Hiroshimacity2/2012/JPN | LC145794         | 2012           | JPN      | GII.P16       | GII.2           |
| Hu/GII.P16-GII.2/Hiroshimacity1/2012/JPN | LC145795         | 2012           | JPN      | GII.P16       | GII.2           |
| Hu/GII.P16-GII.2/Ehime1/2012/JPN         | LC145796         | 2012           | JPN      | GII.P16       | GII.2           |
| Hu/GII.P16-GII.2/Ehime2/2012/JPN         | LC145797         | 2012           | JPN      | GII.P16       | GII.2           |
| Hu/GII.P16-GII.2/Aomori7/2014/JPN        | LC145798         | 2014           | JPN      | GII.P16       | GII.2           |
| Hu/GII.P16-GII.2/Akita7/2014/JPN         | LC145799         | 2014           | JPN      | GII.P16       | GII.2           |
| Hu/GII.P16-GII.2/Akita8/2014/JPN         | LC145800         | 2014           | JPN      | GII.P16       | GII.2           |
| Hu/GII.P16-GII.2/Miyagi2/2014/JPN        | LC145801         | 2014           | JPN      | GII.P16       | GII.2           |
| Hu/GII.P16-GII.2/Osaka4/2014/JPN         | LC145802         | 2014           | JPN      | GII.P16       | GII.2           |
| Hu/GII.P16-GII.2/Osaka5/2014/JPN         | LC145803         | 2014           | JPN      | GII.P16       | GII.2           |
| Hu/GII.P16-GII.2/Hiroshima6/2014/JPN     | LC145804         | 2014           | JPN      | GII.P16       | GII.2           |
| Hu/GII.P16-GII.2/Hiroshimacity5/2014/JPN | LC145805         | 2014           | JPN      | GII.P16       | GII.2           |
| Hu/GII.P16-GII.2/Hiroshimacity6/2014/JPN | LC145806         | 2014           | JPN      | GII.P16       | GII.2           |
| Hu/GII.P16-GII.2/Ehime4/2014/JPN         | LC145807         | 2014           | JPN      | GII.P16       | GII.2           |
| Hu/GII.P16-GII.2/Ehime5/2014/JPN         | LC145808         | 2014           | JPN      | GII.P16       | GII.2           |
| Hu/GII.P22-GII.2/OsakaNI/2004/JPN        | DQ366347         | 2004           | JPN      | GII.P22       | GII.2           |
| Hu/GII.P22-GII.2/OC02022/2002/JPN        | AB279556         | 2002           | JPN      | GII.P22       | GII.2           |
| Hu/GII.P22-GII.2/OC01243/2001/JPN        | AB279554         | 2001           | JPN      | GII.P22       | GII.2           |
| Hu/GII.Pc-GII.2/KL109/1978/MYS           | JX846925         | 1978           | MYS      | GII.Pc        | GII.2           |
| Hu/GII.2/Goes28/2005/NLD                 | AB281089         | 2005           | NLD      | NA            | GII.2           |
| Hu/GII.P2-GII.2/OC02012/2002/JPN         | AB279555         | 2002           | JPN      | GII.P2        | GII.2           |
| Hu/GII.P2-GII.2/OH08019/2008/JPN         | AB662867         | 2008           | JPN      | GII.P2        | GII.2           |
| Hu/GII.P16-GII.2/OH10006/2010/JPN        | AB662889         | 2010           | JPN      | GII.P16       | GII.2           |
| Hu/GII.P2-GII.2/OC08079/2008/JPN         | AB662859         | 2008           | JPN      | GII.P2        | GII.2           |
| Hu/GII.2/Rotterdam39E/2002/NLD           | AB281087         | 2002           | NLD      | NA            | GII.2           |
| Hu/GII.2/Heerlen7E/2002/NLD              | AB281086         | 2002           | NLD      | NA            | GII.2           |
| Hu/GII.P16-GII.2/OH10025/2010/JPN        | AB662899         | 2010           | JPN      | GII.P16       | GII.2           |
| Hu/GII.P16-GII.2/OH10013/2010/JPN        | AB662894         | 2010           | JPN      | GII.P16       | GII.2           |
| Hu/GII.P16-GII.2/OC09072/2009/JPN        | AB662870         | 2009           | JPN      | GII.P16       | GII.2           |
| Hu/GII.P2-GII.2/OH06023/2006/JPN         | AB662863         | 2006           | JPN      | GII.P2        | GII.2           |
| Hu/GII.P2-GII.2/OC04038/2004/JPN         | AB279557         | 2004           | JPN      | GII.P2        | GII.2           |
| Hu/GII.2/Maizuru_000602/2000/JPN         | EF547398         | 2000           | JPN      | NA            | GII.2           |
| Hu/GII.P16-GII.2/OC10058/2010/JPN        | AB662880         | 2010           | JPN      | GII.P16       | GII.2           |
| Hu/GII.2/Leeuwarden71/2003/NLD           | AB281088         | 2003           | NLD      | NA            | GII.2           |
| Hu/GII.P2-GII.2/OC04073/2004/JPN         | AB279565         | 2004           | JPN      | GII.P2        | GII.2           |
| Hu/GII.P2-GII.2/OC04071/2004/JPN         | AB279564         | 2004           | JPN      | GII.P2        | GII.2           |
| Hu/GII.P2-GII.2/OC040561/2004/JPN        | AB279560         | 2004           | JPN      | GII.P2        | GII.2           |
| Hu/GII.P2-GII.2/MK04/2004/JPN            | DQ456824         | 2004           | JPN      | GII.P2        | GII.2           |
| Hu/GII.P16-GII.2/OH09028/2009/JPN        | AB662881         | 2009           | JPN      | GII.P16       | GII.2           |
| Hu/GII.P2-GII.2/OC05143/2005/JPN         | AB662852         | 2005           | JPN      | GII.P2        | GII.2           |
| Hu/GII.2/Zwolle25E/2001/NLD              | AB281085         | 2001           | NLD      | NA            | GII.2           |
| Hu/GII.P2-GII.2/OC040562/2004/JPN        | AB279561         | 2004           | JPN      | GII.P2        | GII.2           |
| Hu/GII.P16-GII.2/OH10026/2010/JPN        | AB662900         | 2010           | JPN      | GII.P16       | GII.2           |
| Hu/GII.P16-GII.2/OH10020/2010/JPN        | AB662896         | 2010           | JPN      | GII.P16       | GII.2           |
| Hu/GII.P16-GII.2/OH09032/2009/JPN        | AB662884         | 2009           | JPN      | GII.P16       | GII.2           |
| Hu/GII.P16-GII.2/OC100122/2010/JPN       | AB662876         | 2010           | JPN      | GII.P16       | GII.2           |
| Hu/GII.P2-GII.2/OC06005/2006/JPN         | AB662854         | 2006           | JPN      | GII.P2        | GII.2           |
| Hu/GII.P2-GII.2/OC05145/2005/JPN         | AB662853         | 2005           | JPN      | GII.P2        | GII.2           |
| Hu/GII.P2-GII.2/OC04043/2004/JPN         | AB279559         | 2004           | JPN      | GII.P2        | GII.2           |
| Hu/GII.P2-GII.2/OC04042/2004/JPN         | AB279558         | 2004           | JPN      | GII.P2        | GII.2           |
| Hu/GII.P2-GII.2/OCS030697/2004/JPN       | AB279571         | 2004           | JPN      | GII.P2        | GII.2           |

|                                       |          |      |     |         |       |
|---------------------------------------|----------|------|-----|---------|-------|
| Hu/GII.P2-GII.2/OC04076/2004/JPN      | AB279567 | 2004 | JPN | GII.P2  | GII.2 |
| Hu/GII.P2-GII.2/OC04067/2004/JPN      | AB279563 | 2004 | JPN | GII.P2  | GII.2 |
| Hu/GII.P2-GII.2/OC04059/2004/JPN      | AB279562 | 2004 | JPN | GII.P2  | GII.2 |
| Hu/GII.P16-GII.2/OH100152/2010/JPN    | AB662895 | 2010 | JPN | GII.P16 | GII.2 |
| Hu/GII.2/Vaals87/2005/NLD             | AB281090 | 2005 | NLD | NA      | GII.2 |
| Hu/GII.Ph-GII.2/OC97049/1997/JPN      | AB279553 | 1997 | JPN | GII.Ph  | GII.2 |
| Hu/GII.P2-GII.2/OCS040100/2004/JPN    | AB279573 | 2004 | JPN | GII.P2  | GII.2 |
| Hu/GII.P2-GII.2/OCS040035/2004/JPN    | AB279572 | 2004 | JPN | GII.P2  | GII.2 |
| Hu/GII.P16-GII.2/OC08154/2008/JPN     | AB662861 | 2008 | JPN | GII.P16 | GII.2 |
| Hu/GII.P2-GII.2/OC04075/2004/JPN      | AB279566 | 2004 | JPN | GII.P2  | GII.2 |
| Hu/GII.2/TCH560/2002/USA              | KC998960 | 2002 | USA | NA      | GII.2 |
| Hu/GII.P16-GII.2/OH08020/2008/JPN     | AB662868 | 2008 | JPN | GII.P16 | GII.2 |
| Hu/GII.2/Leeuwarden15/2001/NLD        | AB281084 | 2001 | NLD | NA      | GII.2 |
| Hu/GII.P16-GII.2/CGMH47/2011/TWN      | KC464505 | 2011 | TWN | GII.P16 | GII.2 |
| Hu/GII.P21-GII.2/OCS020289/2002/JPN   | AB279570 | 2002 | JPN | GII.P21 | GII.2 |
| Hu/GII.P2-GII.2/Melksham/1989/GBR     | X81879   | 1989 | GBR | GII.P2  | GII.2 |
| Hu/GII.P16-GII.2/HS255/2011/USA       | KJ407074 | 2011 | USA | GII.P16 | GII.2 |
| Hu/GII.P2-GII.2/OH09030/2009/JPN      | AB662883 | 2009 | JPN | GII.P2  | GII.2 |
| Hu/GII.P2-GII.2/OH09029/2009/JPN      | AB662882 | 2009 | JPN | GII.P2  | GII.2 |
| Hu/GII.P2-GII.2/OC09094/2009/JPN      | AB662871 | 2009 | JPN | GII.P2  | GII.2 |
| Hu/GII.2/Ina/2002/JPN                 | AB195225 | 2002 | JPN | NA      | GII.2 |
| Hu/GII.P2-GII.2/OC09044/2009/JPN      | AB662862 | 2009 | JPN | GII.P2  | GII.2 |
| Hu/GII.2/Coevorden191S/1999/NLD       | AB281081 | 1999 | NLD | NA      | GII.2 |
| Hu/GII.P12-GII.2/OC06014/2006/JPN     | AB662856 | 2006 | JPN | GII.P12 | GII.2 |
| Hu/GII.P12-GII.2/OC05114/2005/JPN     | AB662851 | 2005 | JPN | GII.P12 | GII.2 |
| Hu/GII.P12-GII.2/OC05041/2005/JPN     | AB662850 | 2005 | JPN | GII.P12 | GII.2 |
| Hu/GII.P21-GII.2/OC05010/2005/JPN     | AB279569 | 2005 | JPN | GII.P21 | GII.2 |
| Hu/GII.P2-GII.2/OH10029/2010/JPN      | AB662901 | 2010 | JPN | GII.P2  | GII.2 |
| Hu/GII.P2-GII.2/OH10024/2010/JPN      | AB662898 | 2010 | JPN | GII.P2  | GII.2 |
| Hu/GII.P2-GII.2/OH100112/2010/JPN     | AB662892 | 2010 | JPN | GII.P2  | GII.2 |
| Hu/GII.P2-GII.2/OH07013/2007/JPN      | AB662865 | 2007 | JPN | GII.P2  | GII.2 |
| Hu/GII.P2-GII.2/OH07001/2007/JPN      | AB662864 | 2007 | JPN | GII.P2  | GII.2 |
| Hu/GII.P2-GII.2/OH10031/2010/JPN      | AB662902 | 2010 | JPN | GII.P2  | GII.2 |
| Hu/GII.P2-GII.2/OH10007/2010/JPN      | AB662890 | 2010 | JPN | GII.P2  | GII.2 |
| Hu/GII.P2-GII.2/OH10001/2010/JPN      | AB662887 | 2010 | JPN | GII.P2  | GII.2 |
| Hu/GII.P2-GII.2/OH09035/2009/JPN      | AB662886 | 2009 | JPN | GII.P2  | GII.2 |
| Hu/GII.P2-GII.2/OC100182/2010/JPN     | AB662877 | 2010 | JPN | GII.P2  | GII.2 |
| Hu/GII.P2-GII.2/OC10009/2010/JPN      | AB662875 | 2010 | JPN | GII.P2  | GII.2 |
| Hu/GII.P2-GII.2/OH08009/2008/JPN      | AB662866 | 2008 | JPN | GII.P2  | GII.2 |
| Hu/GII.P2-GII.2/OC07107/2007/JPN      | AB662858 | 2007 | JPN | GII.P2  | GII.2 |
| Hu/GII.P16-GII.2/104320/2011/JPN      | AB629946 | 2011 | JPN | GII.P16 | GII.2 |
| Hu/GII.P12-GII.2/OC04169/2004/JPN     | AB279568 | 2004 | JPN | GII.P12 | GII.2 |
| Hu/GII.P2-GII.2/OH10008/2010/JPN      | AB662891 | 2010 | JPN | GII.P2  | GII.2 |
| Hu/GII.P2-GII.2/OH100052/2010/JPN     | AB662888 | 2010 | JPN | GII.P2  | GII.2 |
| Hu/GII.P2-GII.2/OC09104/2009/JPN      | AB662873 | 2009 | JPN | GII.P2  | GII.2 |
| Hu/GII.P2-GII.2/OH09034/2009/JPN      | AB662885 | 2009 | JPN | GII.P2  | GII.2 |
| Hu/GII.P2-GII.2/OH080292/2008/JPN     | AB662869 | 2008 | JPN | GII.P2  | GII.2 |
| Hu/GII.P2-GII.2/1014/2010/JPN         | AB629941 | 2010 | JPN | GII.P2  | GII.2 |
| Hu/GII.P2-GII.2/OC10026/2010/JPN      | AB662879 | 2010 | JPN | GII.P2  | GII.2 |
| Hu/GII.P2-GII.2/OC08124/2008/JPN      | AB662860 | 2008 | JPN | GII.P2  | GII.2 |
| Hu/GII.2/Delft48M/2000/NLD            | AB281083 | 2000 | NLD | NA      | GII.2 |
| Hu/GII.P21-GII.2/NF2002/2002/USA      | JQ320072 | 2002 | USA | GII.P21 | GII.2 |
| Hu/GII.2/DenHaag37/2000/NLD           | AB281082 | 2000 | NLD | NA      | GII.2 |
| Hu/GII.2/OC080306/2008/JPN            | AB535749 | 2008 | JPN | NA      | GII.2 |
| Hu/GII.2/Chesterfield434/1997/USA     | AY054300 | 1997 | USA | NA      | GII.2 |
| Hu/GII.Pc-GII.2/SnowMountain/1976/USA | U75682   | 1976 | USA | GII.Pc  | GII.2 |
| Hu/GII.P16-GII.2/OH10012/2010/JPN     | AB662893 | 2010 | JPN | GII.P16 | GII.2 |
| Hu/GII.P16-GII.2/OH10021/2010/JPN     | AB662897 | 2010 | JPN | GII.P16 | GII.2 |
| Hu/GII.P12-GII.2/OC060083/2006/JPN    | AB662855 | 2006 | JPN | GII.P12 | GII.2 |
| Hu/GII.2/BUDS/2002/USA                | AY660568 | 2002 | USA | NA      | GII.2 |
| Hu/GII.Pc-GII.2/CHDC2596/1975/USA     | KC597138 | 1975 | USA | GII.Pc  | GII.2 |
| Hu/GII.P2-GII.2/OC10019/2010/JPN      | AB662878 | 2010 | JPN | GII.P2  | GII.2 |
| Hu/GII.P2-GII.2/OC09103/2009/JPN      | AB662872 | 2009 | JPN | GII.P2  | GII.2 |
| Hu/GII.P2-GII.2/OC09109-2/2009/JPN    | AB662874 | 2009 | JPN | GII.P2  | GII.2 |
| Hu/GII.P16-GII.2/16-G0904/GER         | KY357453 | 2016 | GER | GII.P16 | GII.2 |

|                                                      |          |      |     |         |        |
|------------------------------------------------------|----------|------|-----|---------|--------|
| Hu/GII.P16-GII.2/16-G0856/GER                        | KY357450 | 2016 | GER | GII.P16 | GII.2  |
| Hu/GII.P16-GII.2/16-G0907/GER                        | KY357451 | 2016 | GER | GII.P16 | GII.2  |
| Hu/GII.P16-GII.2/16-G0887/GER                        | KY357454 | 2016 | GER | GII.P16 | GII.2  |
| Hu/GII.P16-GII.2/16-G0901/GER                        | KY357462 | 2016 | GER | GII.P16 | GII.2  |
| Hu/GII.P16-GII.2/16-G0912/GER                        | KY357456 | 2016 | GER | GII.P16 | GII.2  |
| Hu/GII.P16-GII.2/16-G0880/GER                        | KY357452 | 2016 | GER | GII.P16 | GII.2  |
| Hu/GII.P16-GII.2/16-G0911/GER                        | KY357457 | 2016 | GER | GII.P16 | GII.2  |
| Hu/GII.P16-GII.2/16-G0905/GER                        | KY357455 | 2016 | GER | GII.P16 | GII.2  |
| Hu/GII.P16-GII.2/16-G0896/GER                        | KY357458 | 2016 | GER | GII.P16 | GII.2  |
| Hu/GII.P16-GII.2/16-G0831/GER                        | KY357449 | 2016 | GER | GII.P16 | GII.2  |
| Hu/GII.P16-GII.2/16-G0858/GER                        | KY357461 | 2016 | GER | GII.P16 | GII.2  |
| Hu/GII.P16-GII.2/16-G0895/GER                        | KY357460 | 2016 | GER | GII.P16 | GII.2  |
| Hu/GII.2/16F2161/2016/CHN                            | KY485126 | 2016 | CHN | NA      | GII.2  |
| Hu/GII.2/16F2149/2016/CHN                            | KY485125 | 2016 | CHN | NA      | GII.2  |
| Hu/GII.2/16F2152/2016/CHN                            | KY485124 | 2016 | CHN | NA      | GII.2  |
| Hu/GII.2/16SF21134/2016/CHN                          | KY485123 | 2016 | CHN | NA      | GII.2  |
| Hu/GII.2/16SF21132/2016/CHN                          | KY485122 | 2016 | CHN | NA      | GII.2  |
| Hu/GII.2/16SF2030/2016/CHN                           | KY485121 | 2016 | CHN | NA      | GII.2  |
| Hu/GII.2/16SF2029/2016/CHN                           | KY485120 | 2016 | CHN | NA      | GII.2  |
| Hu/GII.2/16SF2285/2016/CHN                           | KY485119 | 2016 | CHN | NA      | GII.2  |
| Hu/GII.2/16SF2153/2016/CHN                           | KY485118 | 2016 | CHN | NA      | GII.2  |
| Hu/GII.2/16SF2151/2016/CHN                           | KY485117 | 2016 | CHN | NA      | GII.2  |
| Hu/GII.2/16SF2026/2016/CHN                           | KY485116 | 2016 | CHN | NA      | GII.2  |
| Hu/GII.2/16SF2025/2016/CHN                           | KY485115 | 2016 | CHN | NA      | GII.2  |
| Hu/GII.P2-GII.2/H7/2002/BEL                          | FJ409630 | 2002 | BEL | GII.P2  | GII.2  |
| Hu/GII.P2-GII.2/OC04039/2004/JPN                     | AB279574 | 2004 | JPN | GII.P2  | GII.2  |
| Hu/GII.P2-GII.2/Seoul_0460/2009/KOR                  | HM635168 | 2009 | KOR | GII.P2  | GII.2  |
| Hu/GII.P2-GII.2/Seoul_0561/2009/KOR                  | HM635123 | 2009 | KOR | GII.P2  | GII.2  |
| Hu/GII.P2-GII.2/Seoul1654/2011/KOR                   | JX439806 | 2011 | KOR | GII.P2  | GII.2  |
| Hu/GII.P2-GII.2/Seoul1642/2011/KOR                   | JX439805 | 2011 | KOR | GII.P2  | GII.2  |
| Hu/GII.P2-GII.2/Seoul1598/2011/KOR                   | JX439804 | 2011 | KOR | GII.P2  | GII.2  |
| Hu/GII.P2-GII.2/Rotterdam/2009/NLD                   | KX446499 | 2009 | NLD | GII.P2  | GII.2  |
| Hu/GII.P2-GII.2/SanSebastian70100349/2012/ESP        | KJ504408 | 2012 | ESP | GII.P2  | GII.2  |
| Hu/GII.P2-GII.2/IPH2161-08VG06/2008/BEL              | JF697283 | 2008 | BEL | GII.P2  | GII.2  |
| Hu/GII.P2-GII.2/SanSebastian252752/2011/ESP          | KJ504407 | 2011 | ESP | GII.P2  | GII.2  |
| Hu/GII.P2-GII.2/IPH2162-08VG06/2008/BEL              | JF697284 | 2008 | BEL | GII.P2  | GII.2  |
| Hu/GII.P2-GII.2/HMO50-201311/2013/NOR                | KX019857 | 2013 | NOR | GII.P2  | GII.2  |
| Hu/GII.P2-GII.2/NoV750/2004/CAN                      | EF078288 | 2004 | CAN | GII.P2  | GII.2  |
| Hu/GII.P2-GII.2/BZ788/2012/ITA                       | KF475968 | 2012 | ITA | GII.P2  | GII.2  |
| Hu/GII.P2-GII.2/Toyama_Jun44530/2010/JPN             | LC147168 | 2010 | JPN | GII.P2  | GII.2  |
| Hu/GII.P2-GII.2/Toyama_Feb-Mar23914/2010/JPN         | LC147152 | 2010 | JPN | GII.P2  | GII.2  |
| Hu/GII.P2-GII.2/Toyama_Mar23713/2010/JPN             | LC147151 | 2010 | JPN | GII.P2  | GII.2  |
| Hu/GII.P2-GII.2/Toyama_outbreakJan331/2010/JPN       | LC147139 | 2010 | JPN | GII.P2  | GII.2  |
| Hu/GII.P2-GII.2/Toyama_May42426/2010/JPN             | LC147164 | 2010 | JPN | GII.P2  | GII.2  |
| Hu/GII.P2-GII.2/Toyama_outbreakMay41825/2010/JPN     | LC147163 | 2010 | JPN | GII.P2  | GII.2  |
| Hu/GII.P16-GII.3/Smolensk_S12-31/2012/RUS            | KF895841 | 2012 | RUS | GII.P16 | GII.3  |
| Hu/GII.P16-GII.3/Novosibirsk_Nsk-N1648/2011/RUS      | KF944111 | 2011 | RUS | GII.P16 | GII.3  |
| Hu/GII.P16-GII.3/Novosibirsk_Nsk-N1659/2011/RUS      | KF944110 | 2011 | RUS | GII.P16 | GII.3  |
| Hu/GII.P16-GII.3/Omsk_O13702012/2012/RUS             | KT779557 | 2012 | RUS | GII.P16 | GII.3  |
| Hu/GII.P16-GII.13/13-BA-1/2013/TWN                   | KM036380 | 2013 | TWN | GII.P16 | GII.13 |
| Hu/GII.P16-GII.4_Sydney_2012/CA3477/2015/USA         | KX907727 | 2015 | USA | GII.P16 | GII.4  |
| Hu/GII.P16-GII.4_Sydney_2012/Kawasaki194/2016/JPN    | LC175468 | 2016 | JPN | GII.P16 | GII.4  |
| Hu/GII.P16-GII.17/Saitama_T87/2002/JPN               | KJ196286 | 2002 | JPN | GII.P16 | GII.17 |
| Hu/GII.P16-GII.16/NLV_Neustrelitz260/2000/GER        | AY772730 | 2000 | GER | GII.P16 | GII.16 |
| Hu/GII.P16-GII.2/12-L/2012/TWN                       | KJ145320 | 2012 | TWN | GII.P16 | GII.2  |
| Hu/GII.P16-GII.2/Wuhan_E2116/2010/CHN                | JQ751039 | 2010 | CHN | GII.P16 | GII.2  |
| Hu/GII.P16-GII.2/12-F-2/2012/TWN                     | KJ145321 | 2012 | TWN | GII.P16 | GII.2  |
| Hu/GII.P16-GII.2/13/2010/CHN                         | KM044122 | 2010 | CHN | GII.P16 | GII.2  |
| Hu/GII.P16-GII.2/33/2011/CHN                         | KM044166 | 2011 | CHN | GII.P16 | GII.2  |
| Hu/GII.P16-GII.2/GILL70/2012/KOR                     | KC110856 | 2012 | KOR | GII.P16 | GII.2  |
| Hu/GII.P16-GII.2/L53Beijing/2011/CHN                 | JQ889817 | 2011 | CHN | GII.P16 | GII.2  |
| Hu/GII.P16-GII.2/Wuhan_DHGX-2/2010/CHN               | JQ751041 | 2010 | CHN | GII.P16 | GII.2  |
| Hu/GII.P16-GII.2/Seoul1921/2012/KOR                  | JX439906 | 2012 | KOR | GII.P16 | GII.2  |
| Hu/GII.P16-GII.2/Wuhan_E2120/2010/CHN                | JQ751040 | 2010 | CHN | GII.P16 | GII.2  |
| Hu/GII.P16-GII.4_New_Orleans_2009/Seoul1034/2010/KOF | JX439829 | 2010 | KOR | GII.P16 | GII.4  |

|                                                |          |      |     |         |        |
|------------------------------------------------|----------|------|-----|---------|--------|
| Hu/GII.P16-GII.2/Seoul1216/2010/KOR            | JX439783 | 2010 | KOR | GII.P16 | GII.2  |
| Hu/GII.P16-GII.16/VannesL23/1999/FRA           | AY682551 | 1999 | FRA | GII.P16 | GII.16 |
| Hu/GII.P16-GII.16/Beijing55171/2008/CHN        | GQ856476 | 2008 | CHN | GII.P16 | GII.16 |
| Hu/GII.P16-GII.10/4CAU14/2012/KOR              | KC110854 | 2012 | KOR | GII.P16 | GII.10 |
| Hu/GII.P16-GII.16/Wuxi_G12/2013/CHN            | KP195703 | 2013 | CHN | GII.P16 | GII.16 |
| Hu/GII.P16-GII.13/99/2013/CHN                  | KM044238 | 2013 | CHN | GII.P16 | GII.13 |
| Hu/GII.P16-GII.13/SanSebastian356037/2010/ESP  | KJ156623 | 2010 | ESP | GII.P16 | GII.13 |
| Hu/GII.P16-GII.13/Dhaka32/2011/BGD             | JX683115 | 2011 | BGD | GII.P16 | GII.13 |
| Hu/GII.P16-GII.2/09188467/2009/AUS             | KP202189 | 2009 | AUS | GII.P16 | GII.2  |
| Hu/GII.P16-GII.13/10N4439/2010/NPL             | AB810005 | 2010 | NPL | GII.P16 | GII.13 |
| Hu/GII.P16-GII.13/10N4358/2010/NPL             | AB810004 | 2010 | NPL | GII.P16 | GII.13 |
| Hu/GII.P16-GII.13/49/2011/CHN                  | KM044183 | 2011 | CHN | GII.P16 | GII.13 |
| Hu/GII.P16-GII.3/SanSebastian70100075/2012/ESP | KJ504421 | 2012 | ESP | GII.P16 | GII.3  |
| Hu/GII.P16-GII.13/Berlin1195/2012/DEU          | KC832472 | 2012 | DEU | GII.P16 | GII.13 |
| Hu/GII.P16-GII.13/09N3751/2009/NPL             | AB809993 | 2009 | NPL | GII.P16 | GII.13 |
| Hu/GII.P16-GII.16/22-2_Tokyo/1975/JPN          | AB684676 | 1975 | JPN | GII.P16 | GII.16 |
| Hu/GII.P16-GII.13/Wuxi_G7/2013/CHN             | KP174834 | 2013 | CHN | GII.P16 | GII.13 |
| Hu/GII.P16-GII.13/09N3816/2009/NPL             | AB809998 | 2009 | NPL | GII.P16 | GII.13 |
| Hu/GII.P16-GII.13/09N3798/2009/NPL             | AB809997 | 2009 | NPL | GII.P16 | GII.13 |
| Hu/GII.P16-GII.13/HuzhouNS13045/2013/CHN       | KM501037 | 2013 | CHN | GII.P16 | GII.13 |
| Hu/GII.P16-GII.13/58/2012/CHN                  | KM044193 | 2012 | CHN | GII.P16 | GII.13 |
| Hu/GII.P16-GII.13/PR1395/2012/ITA              | KJ473826 | 2012 | ITA | GII.P16 | GII.13 |
| Hu/GII.P16-GII.3/PR4526/2012/ITA               | KJ473824 | 2012 | ITA | GII.P16 | GII.3  |
| Hu/GII.P16-GII.3/SanSebastian132848/2012/ESP   | KJ504423 | 2012 | ESP | GII.P16 | GII.3  |
| Hu/GII.P16-GII.3/SanSebastian133330/2012/ESP   | KJ504422 | 2012 | ESP | GII.P16 | GII.3  |
| Hu/GII.P16-GII.13/Luckenwalde1378/2012/DEU     | KC832473 | 2012 | DEU | GII.P16 | GII.13 |
| Hu/GII.P16-GII.3/PR11068/2011/ITA              | KJ473823 | 2011 | ITA | GII.P16 | GII.3  |
| Hu/GII.P16-GII.3/SanSebastian132583/2012/ESP   | KJ504419 | 2012 | ESP | GII.P16 | GII.3  |
| Hu/GII.P16-GII.3/SanSebastian15252748/2012/ESP | KJ504418 | 2012 | ESP | GII.P16 | GII.3  |
| Hu/GII.P16-GII.3/SanSebastian131919/2012/ESP   | KJ504417 | 2012 | ESP | GII.P16 | GII.3  |
| Hu/GII.P16-GII.13/Berlin1162/2012/DEU          | KC832470 | 2012 | DEU | GII.P16 | GII.13 |
| Hu/GII.P16-GII.2/4CAU38/2012/KOR               | KC110857 | 2012 | KOR | GII.P16 | GII.2  |
| Hu/GII.P16-GII.3/IDH2872/2010/IND              | AB757784 | 2010 | IND | GII.P16 | GII.3  |
| Hu/GII.P16-GII.13/HuzhouNS13102/2013/CHN       | KM501038 | 2013 | CHN | GII.P16 | GII.13 |
| Hu/GII.P16-GII.3/SanSebastian132719/2012/ESP   | KJ504416 | 2012 | ESP | GII.P16 | GII.3  |
| Hu/GII.P16-GII.13/Oranienburg1190/2012/DEU     | KC832471 | 2012 | DEU | GII.P16 | GII.13 |
| Hu/GII.P16-GII.16/7137_Moscow/2005/RUS         | FJ383842 | 2005 | RUS | GII.P16 | GII.16 |
| Hu/GII.P16-GII.13/IDH2770/2010/IND             | AB757783 | 2010 | IND | GII.P16 | GII.13 |
| Hu/GII.P16-GII.3/Dhaka53/2012/BGD              | JX683114 | 2012 | BGD | GII.P16 | GII.3  |
| Hu/GII.P16-GII.3/PV_Voelk0018/2013/DEU         | KM289172 | 2013 | DEU | GII.P16 | GII.3  |
| Hu/GII.P16-GII.4/20160118_EL03LP2/2016/KOR     | KX764848 | 2016 | KOR | GII.P16 | GII.4  |
| Hu/GII.P16-GII.4/20160118_EL03ALP2/2016/KOR    | KX764849 | 2016 | KOR | GII.P16 | GII.4  |
| Hu/GII.P16-GII.4/20160118_EL03BLP2/2016/KOR    | KX764850 | 2016 | KOR | GII.P16 | GII.4  |
| Hu/GII.P16-GII.4/20160118_EL06LP1/2016/KOR     | KX764851 | 2016 | KOR | GII.P16 | GII.4  |
| Hu/GII.P16-GII.4/20160122_FL01ALP1/2016/KOR    | KX764852 | 2016 | KOR | GII.P16 | GII.4  |
| Hu/GII.P16-GII.4/20160122_FL01CLP1/2016/KOR    | KX764853 | 2016 | KOR | GII.P16 | GII.4  |
| Hu/GII.P16-GII.4/20160122_FL01DLP1/2016/KOR    | KX764854 | 2016 | KOR | GII.P16 | GII.4  |
| Hu/GII.P16-GII.4/20160122_FL07LP2/2016/KOR     | KX764855 | 2016 | KOR | GII.P16 | GII.4  |
| Hu/GII.P16-GII.4/20160122_FL07ALP3/2016/KOR    | KX764856 | 2016 | KOR | GII.P16 | GII.4  |
| Hu/GII.P16-GII.2/16F2284/2016/CHN              | KY485110 | 2016 | CHN | GII.P16 | GII.2  |
| Hu/GII.P16-GII.2/16F21134/2016/CHN             | KY485113 | 2016 | CHN | GII.P16 | GII.2  |
| Hu/GII.P16-GII.2/16F2029/2016/CHN              | KY485112 | 2016 | CHN | GII.P16 | GII.2  |
| Hu/GII.P16-GII.2/16F2026/2016/CHN              | KY485111 | 2016 | CHN | GII.P16 | GII.2  |
| Hu/GII.P16-GII.2/16F2025/2016/CHN              | KY485109 | 2016 | CHN | GII.P16 | GII.2  |
| Hu/GII.P16-GII.2/16F21132/2016/CHN             | KY485108 | 2016 | CHN | GII.P16 | GII.2  |
| Hu/GII.P16-GII.2/16F2285/2016/CHN              | KY485114 | 2016 | CHN | GII.P16 | GII.2  |
| Hu/GII.P16-GII.2/16F2019/2016/CHN              | KY485107 | 2016 | CHN | GII.P16 | GII.2  |

NA: Not available
