# Supplementary material for: Phylogenetic Analyses Suggest that Factors Other Than the Capsid Protein Play a Role in the Epidemic Potential of GII.2 Norovirus
Source: PubMed Central journal article supplement (PMC5437133; doi:10.1128/mspheredirect.00187-17), 2017-05-17
Supplement: sph003172286st8.pdf [file sph003172286st8.pdf]

**Table S2. Codon position of complete VP1 sequences (1629 nt) with positive selection**

| <b>Positively selected site</b> | <b>Method (p value)</b>                     | <b>Domain</b> |
|---------------------------------|---------------------------------------------|---------------|
| 24                              | MEME <sup>1</sup> (p=0.025)                 | N-terminal    |
| 78                              | iFEL <sup>2</sup> (p=0.018), MEME (p=0.044) | Shell         |
| 99                              | MEME (p=0.021)                              | Shell         |
| 275                             | MEME (p=0.012)                              | P1            |
| 344                             | MEME (p=0.036)                              | P2 (surface)  |
| 345                             | iFEL (p<0.01), MEME (p=0.019)               | P2 (surface)  |
| 354                             | MEME (p=0.047)                              | P2 (surface)  |
| 384                             | MEME (p<0.01)                               | P2 (surface)  |
| 385                             | MEME (p=0.023)                              | P2 (surface)  |

1. Mixed Effect Model of Evolution, 2. internal Fixed Effect Likelihood methods
