# Supplementary material for: Phylogenetic Analyses Suggest that Factors Other Than the Capsid Protein Play a Role in the Epidemic Potential of GII.2 Norovirus
Source: PubMed Central journal article supplement (PMC5437133; doi:10.1128/mspheredirect.00187-17), 2017-05-17
Supplement: sph003172286st9.pdf [file sph003172286st9.pdf]

**Table S3: Amino acid substitution observed in the RdRp sequence of reemerging GII.P16 strains**

|                                                                             | 293 | 332 | 357 | 360 |
|-----------------------------------------------------------------------------|-----|-----|-----|-----|
| Reemerging GII.P16 (2016)                                                   | T   | I   | Q   | A   |
| P16 cluster <sup>1</sup> (2008-2014)                                        | S   | V   | K   | T   |
| P2-P16 mix cluster <sup>1</sup> (2009-2013)<br>(without reemerging strains) | S   | V   | K   | T   |

1. Phylogenetic clustering shown in Fig. 4, assigned based on the phylogenetic clustering of VP1 encoding sequence and the associated polymerase genotype
