# Supplementary material for: Phylogenetic Analyses Suggest that Factors Other Than the Capsid Protein Play a Role in the Epidemic Potential of GII.2 Norovirus
Source: PubMed Central journal article supplement (PMC5437133; doi:10.1128/mspheredirect.00187-17), 2017-05-17
Supplement: sph003172286st10.pdf [file sph003172286st10.pdf]

**Table S4: Evolutionary models used in BEAST analyses**

| <b>Sequence</b> | <b>Genotype</b> | <b>Dataset</b>             | <b>#. Sequences</b> | <b>Length (nt)</b> | <b>Substitution model</b> | <b>Clock model</b> | <b>Tree prior</b> |
|-----------------|-----------------|----------------------------|---------------------|--------------------|---------------------------|--------------------|-------------------|
| VP1, partial    | GII.2           | All                        | 151                 | 1337               | TN93+G+I                  | Strict             | Bayesian Skyline  |
|                 |                 | P2 cluster                 | 47                  | 1337               | TN93+G                    | Strict             | Bayesian Skyline  |
|                 |                 | P2-P16 mix cluster         | 36                  | 1337               | TN93+G+I                  | Strict             | Bayesian Skyline  |
|                 |                 | P16 cluster                | 38                  | 1337               | TN93+G+I                  | Strict             | Bayesian Skyline  |
| VP1, complete   | GII.2           | All                        | 134                 | 1629               | TN93+G+I                  | Strict             | Bayesian Skyline  |
|                 |                 | P2 cluster                 | 47                  | 1629               | TN93+G                    | Strict             | Bayesian Skyline  |
|                 |                 | P2-P16 mix cluster         | 23                  | 1629               | TN93+G                    | Strict             | Exponential       |
|                 |                 | P16 cluster                | 36                  | 1629               | TN93+G                    | Strict             | Bayesian Skyline  |
| RdRp, partial   | GII.P2          | All                        | 72                  | 720                | K2P+G                     | Strict             | Bayesian Skyline  |
|                 | GII.P16         | All                        | 131                 | 720                | K2P+G                     | Strict             | Bayesian Skyline  |
|                 |                 | Without reemerging GII.P16 | 99                  | 720                | K2P+G                     | Strict             | Exponential       |
